# Supplementary material for: Expression and regulation of drug transporters in vertebrate neutrophils
Source: PubMed Central journal article supplement (PMC5504015; doi:10.1038/s41598-017-04785-4), 2017-07-10
Supplement: 41598_2017_4785_MOESM1_ESM.pdf [file 41598_2017_4785_MOESM1_ESM.pdf]

## Supplementary Information (SI)

### Expression and regulation of drug transporters in vertebrate neutrophils

Matthew J. Foulkes<sup>1,2,3,\*</sup>, Katherine M. Henry<sup>1,3,\*</sup>, Julien Rougeot<sup>4</sup>, Ed Hooper-Greenhill<sup>5</sup>, Catherine A. Loynes<sup>1,3</sup>, Phil Jeffrey<sup>6</sup>, Angeleen Fleming<sup>7,8</sup>, Caroline O. Savage<sup>5</sup>, Annemarie H. Meijer<sup>4</sup>, Simon Jones<sup>2</sup> & Stephen A. Renshaw<sup>1,3</sup>

<sup>1</sup> The Bateson Centre, The University of Sheffield, Sheffield, S10 2TN, UK.

<sup>2</sup> Department of Chemistry, The University of Sheffield, Sheffield, S3 7HF, UK.

<sup>3</sup> Department of Infection, Immunity & Cardiovascular Disease, The University of Sheffield, Sheffield, S10 2RX, UK.

<sup>4</sup> Institute of Biology, University of Leiden, 2333 CC, Leiden, The Netherlands.

<sup>5</sup> Immuno-Inflammation Therapy Area Unit, GlaxoSmithKline Research and Development Ltd., Stevenage, SG1 2NY, UK.

<sup>6</sup> Rare Diseases Research Unit, Pfizer Ltd., Cambridge, CB21 6GP, UK.

<sup>7</sup> Department of Physiology, Development and Neuroscience, University of Cambridge, Cambridge, CB2 3EG, UK.

<sup>8</sup> Department of Medical Genetics, University of Cambridge, Cambridge Institute for Medical Research, Addenbrooke's Hospital, Cambridge, CB2 2XY, UK.

\*These authors contributed equally to this work.

Correspondence and requests for materials should be addressed to S.A.R. (email: [s.a.renshaw@sheffield.ac.uk](mailto:s.a.renshaw@sheffield.ac.uk)).

## Supplementary Figure S1. Subsets of SLC transporter proteins are expressed and regulated in primary human neutrophils.

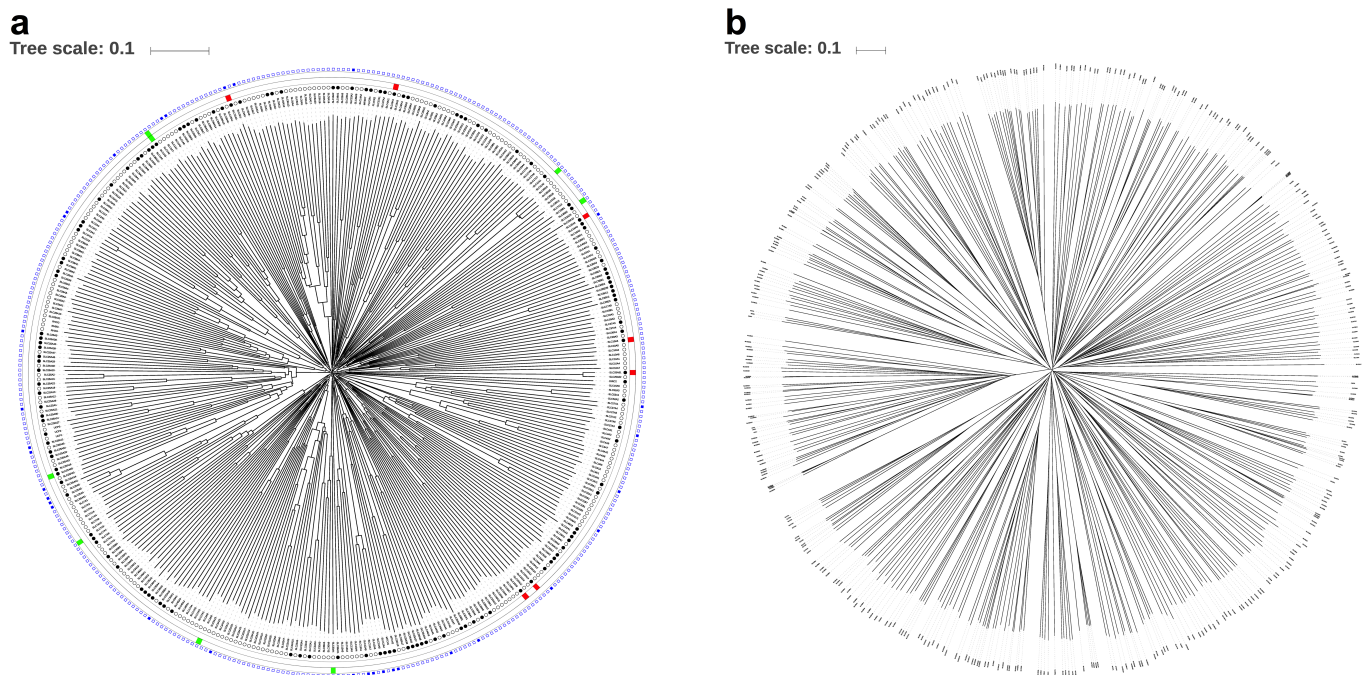

Scalable phylogenetic trees in both **(a)** circular and **(b)** unrooted display modes indicate evolutionary relationships between SLC transporter proteins in humans. Branch lengths are proportional to genetic distance. In **(a)**, for primary human neutrophil expression data (inner circle), expressed proteins are marked with a black dot, whereas proteins not expressed are denoted with a white dot. For GM-CSF (second circle from centre) and TNF $\alpha$  (third circle from centre) regulation data, significant up-regulation of a gene is denoted with a green box, significant down-regulation is denoted by a red box, and a lack of significant change in regulation is unmarked. For human neutrophil proteomics data (outer circle), any proteins identified in one or more of the analyses are denoted with a blue box, and any not identified are denoted with a white box.

**Supplementary Figure S2. Subsets of ABC transporter proteins are expressed but not regulated in primary human neutrophils.**

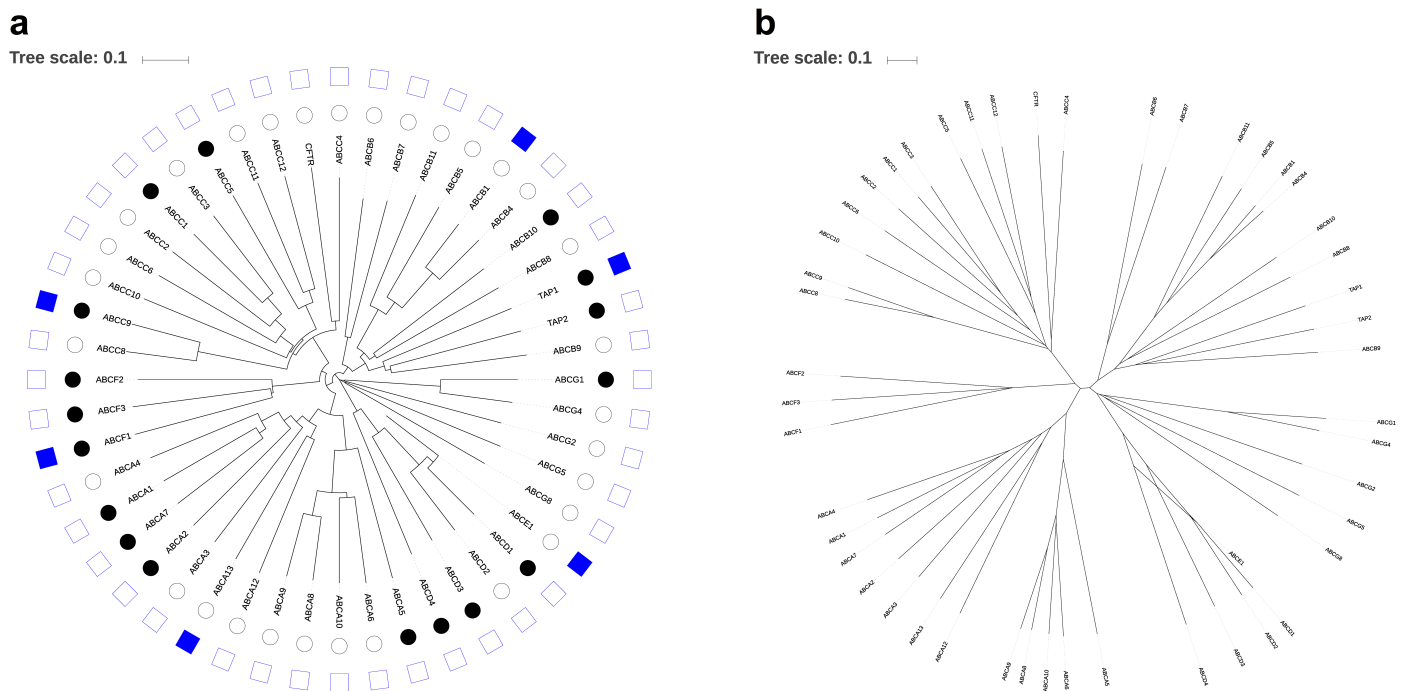

Scalable phylogenetic trees in both (a) circular and (b) unrooted display modes indicate evolutionary relationships between ABC transporter proteins in humans. Branch lengths are proportional to genetic distance. In (a), for primary human neutrophil expression data (inner circle), expressed proteins are marked with a black dot, whereas proteins not expressed are denoted with a white dot. For human neutrophil proteomics data (outer circle), any proteins identified in one or more of the analyses are denoted with a blue box, and any not identified are denoted with a white box.

**Supplementary Table S3. Expression of SLC transporter proteins is largely consistent across two different datasets.**

| SLC transporter | Expression (FPKM)           |                                 |
|-----------------|-----------------------------|---------------------------------|
|                 | Wright <i>et al.</i> , 2013 | Chatterjee <i>et al.</i> , 2016 |
| <i>SLC16A3</i>  | 416.071                     | 206.7938                        |
| <i>SLC2A3</i>   | 384.863                     | 146.301                         |
| <i>SLC25A37</i> | 365.439                     | <b>No data</b>                  |
| <i>SLC44A2</i>  | 296.96                      | 305.502                         |
| <i>SLC11A1</i>  | 241.006                     | 375.1498                        |
| <i>SLC6A6</i>   | 174.964                     | 308.898                         |
| <i>SLC43A2</i>  | 142.397                     | 195.5783                        |
| <i>SLC15A3</i>  | 114.121                     | 203.8168                        |
| <i>SLC12A6</i>  | 107.268                     | 86.26105                        |
| <i>SLC15A4</i>  | 101.968                     | 132.1664                        |
| <i>SLC38A2</i>  | 73.4412                     | 51.29513                        |
| <i>SLC45A4</i>  | 62.3642                     | 34.80962                        |
| <i>SLC25A3</i>  | 60.4501                     | 74.8113                         |
| <i>SLC31A2</i>  | 59.4817                     | 107.9547                        |
| <i>MTCH1</i>    | 58.9362                     | 96.06843                        |
| <i>SLC19A1</i>  | 56.8214                     | 50.80168                        |
| <i>SLCO3A1</i>  | 53.1765                     | 134.5328                        |
| <i>SLC12A9</i>  | 52.23                       | 147.5515                        |
| <i>SLC40A1</i>  | 37.6849                     | 166.2416                        |
| <i>UCP2</i>     | 35.2824                     | 77.73278                        |
| <i>SLC25A44</i> | 33.7158                     | 58.39863                        |
| <i>SLC20A1</i>  | 33.0773                     | 16.14776                        |
| <i>SLC9A1</i>   | 25.9958                     | 31.72053                        |
| <i>SLC22A4</i>  | 24.431                      | 30.64313                        |
| <i>SLC25A28</i> | 23.1132                     | 26.53685                        |
| <i>DIRC2</i>    | 22.9076                     | 4.079744                        |
| <i>SLC39A1</i>  | 21.6872                     | 24.02363                        |
| <i>SLC22A18</i> | 21.182                      | 36.2852                         |
| <i>SLC38A10</i> | 21.1819                     | 30.27238                        |
| <i>SLC7A5</i>   | 20.6468                     | 1.637648                        |
| <i>SLC9A8</i>   | 19.8604                     | 18.75233                        |
| <i>SLC25A5</i>  | 19.6541                     | 35.83148                        |
| <i>SLC29A1</i>  | 17.9369                     | 36.96945                        |
| <i>SLC3A2</i>   | 17.5905                     | 22.47888                        |
| <i>SLC25A11</i> | 17.5471                     | 25.77163                        |

|          |         |                |
|----------|---------|----------------|
| SLC8B1   | 16.841  | 11.64638       |
| SLC7A7   | 16.7696 | 31.3496        |
| SLC16A5  | 14.6446 | 30.8605        |
| SLC35A2  | 12.2554 | 9.707798       |
| SLC8A1   | 12.0016 | 10.08038       |
| SLC16A6  | 11.2322 | 5.730955       |
| SLC35A4  | 11.1066 | 13.25903       |
| SLC39A7  | 10.6539 | 34.74275       |
| SLC25A51 | 10.198  | 10.5348        |
| SLC35C2  | 10.005  | 28.4959        |
| SLC35E1  | 9.68586 | <b>No data</b> |
| SLC36A1  | 9.58739 | 8.930435       |
| SLC10A3  | 9.23775 | 11.80692       |
| SLC36A4  | 9.22429 | 5.119257       |
| SLC35A5  | 7.91078 | 17.37549       |
| SLC39A6  | 7.26005 | 7.351105       |
| SLC25A1  | 7.10385 | 10.06107       |
| SLC37A3  | 7.06368 | 29.04458       |
| SLC48A1  | 6.77426 | 8.336738       |
| SLC25A29 | 6.73623 | 11.61707       |
| SLC23A2  | 6.58677 | 6.764668       |
| SLC22A15 | 6.44345 | 17.17855       |
| SLC39A9  | 6.18562 | 7.195905       |
| SLC31A1  | 5.99872 | 7.739965       |
| SLC2A1   | 5.77547 | 3.62349        |
| SLC35B1  | 5.4807  | <b>No data</b> |
| SLC35E2B | 5.37585 | 14.90033       |
| SLCO4C1  | 5.25519 | 6.557368       |
| SLC46A3  | 5.17528 | 5.261813       |
| SLC35E3  | 4.72873 | <b>No data</b> |
| SLC35F5  | 4.69507 | 12.34666       |
| SLC26A8  | 4.56664 | 3.324936       |
| SLC30A5  | 4.42129 | 8.462588       |
| SLC38A1  | 4.33379 | 1.82469        |
| SLC19A2  | 4.02632 | 0.802967       |
| SLC22A1  | 3.91727 | 15.31258       |
| SLC50A1  | 3.9015  | 6.878278       |
| SLC35A1  | 3.80725 | <b>No data</b> |
| SLC18A2  | 3.7171  | 1.370494       |
| SLC27A3  | 3.67019 | <b>No data</b> |

|                 |         |                |
|-----------------|---------|----------------|
| <i>SLC25A46</i> | 3.57248 | 4.63701        |
| <i>SLC30A9</i>  | 3.53037 | 4.27509        |
| <i>SLC17A5</i>  | 3.49068 | 3.028465       |
| <i>SLC25A40</i> | 3.45767 | 8.186168       |
| <i>SLC43A3</i>  | 3.4212  | <b>No data</b> |
| <i>SLC2A14</i>  | 3.36893 | 0.906642       |
| <i>FLVCR1</i>   | 3.3331  | 11.74628       |
| <i>SLC25A32</i> | 3.31725 | 1.141212       |
| <i>SLC35B3</i>  | 3.31298 | 6.968573       |
| <i>SLC12A4</i>  | 3.29637 | <b>No data</b> |
| <i>SLC35E2</i>  | 3.24559 | 14.90033       |
| <i>SLC35B2</i>  | 3.1499  | <b>No data</b> |
| <i>SLC25A20</i> | 3.0388  | 13.83024       |
| <i>SLC39A3</i>  | 3.00139 | 4.865003       |
| <i>SLC25A16</i> | 2.88922 | 2.370293       |
| <i>SLC37A1</i>  | 2.87833 | <b>No data</b> |
| <i>SLC44A1</i>  | 2.79355 | 2.664965       |
| <i>SLC7A6</i>   | 2.78867 | 2.361488       |
| <i>SLC39A13</i> | 2.78257 | 4.708685       |
| <i>SLC4A2</i>   | 2.70562 | 14.91975       |
| <i>SLC25A45</i> | 2.66672 | 4.06514        |
| <i>SLC30A6</i>  | 2.55172 | 3.284525       |
| <i>SLC25A39</i> | 2.43246 | 2.116713       |
| <i>SLC5A9</i>   | 2.41311 | 2.3544         |
| <i>SLC25A14</i> | 2.27557 | 4.54853        |
| <i>SLC25A36</i> | 2.24725 | 1.794893       |
| <i>MFS7</i>     | 2.17705 | 4.75029        |
| <i>SLC9A6</i>   | 2.12071 | 2.086033       |
| <i>SLC12A1</i>  | 1.97848 | 11.74522       |
| <i>SLC6A8</i>   | 1.96133 | 2.048953       |
| <i>SLC37A2</i>  | 1.94582 | 2.08544        |
| <i>SLC30A7</i>  | 1.90897 | 7.608707       |
| <i>SLC25A24</i> | 1.90318 | 2.7849         |
| <i>SLC52A2</i>  | 1.83537 | 6.545528       |
| <i>SLC30A1</i>  | 1.65508 | 2.871723       |
| <i>SLC35C1</i>  | 1.6161  | 2.864028       |
| <i>SLC25A33</i> | 1.60194 | 0.085965       |
| <i>SLC35D1</i>  | 1.57019 | 0.861985       |
| <i>SLC26A6</i>  | 1.53617 | 3.069608       |
| <i>SLC39A8</i>  | 1.51151 | 0.808593       |

|          |          |                |
|----------|----------|----------------|
| SLC24A3  | 1.49052  | 0.976179       |
| SLC6A12  | 1.48353  | 3.38105        |
| SLC39A11 | 1.44917  | 1.204404       |
| SLC35D2  | 1.43724  | 3.107213       |
| SLC25A25 | 1.39899  | 1.099743       |
| SLC1A4   | 1.39617  | 0.302471       |
| SLC25A13 | 1.38929  | 1.150665       |
| SLC16A14 | 1.34748  | 0.57943        |
| SLC51A   | 1.32701  | <b>No data</b> |
| SLC25A38 | 1.32695  | 1.032691       |
| SLC25A30 | 1.26993  | 1.05837        |
| SLC25A22 | 1.19878  | 3.907003       |
| SLC5A6   | 1.17366  | 1.142233       |
| SLC35A3  | 1.16899  | 1.344898       |
| SLC1A5   | 1.10623  | 0.933738       |
| MTCH2    | 1.07897  | 3.649688       |
| SLC24A4  | 1.07192  | 2.226199       |
| SLC25A34 | 1.04847  | 1.105145       |
| SLC5A5   | 1.0317   | 0.001373       |
| SLC33A1  | 0.98935  | 1.418693       |
| SLC5A3   | 0.967574 | <b>No data</b> |
| SLC7A8   | 0.962858 | 1.744048       |
| UCP3     | 0.927209 | 0.659301       |
| SLC23A1  | 0.905577 | 0.376388       |
| SLC4A5   | 0.891422 | 0.893974       |
| SLC2A5   | 0.880448 | 0.6242         |
| SLC7A11  | 0.839899 | 0.126315       |
| SLC12A7  | 0.816008 | 0.604336       |
| SLC38A9  | 0.768943 | 2.547703       |
| SLC36A2  | 0.710032 | 0.017288       |
| SLC25A19 | 0.679593 | 0.659763       |
| SLC11A2  | 0.660908 | 0.767677       |
| SLC25A15 | 0.649624 | 0.352065       |
| SLC27A4  | 0.64666  | 1.151295       |
| SLC16A4  | 0.646018 | 0.26843        |
| SLC9A7   | 0.621709 | 0.838211       |
| SLC26A11 | 0.601788 | 0.602508       |
| SLC4A7   | 0.592421 | 0.398962       |
| SLC22A5  | 0.586358 | 1.134696       |
| SLC10A1  | 0.582003 | 0.089458       |

|          |          |                |
|----------|----------|----------------|
| SLC25A17 | 0.58162  | 1.582018       |
| SLC26A2  | 0.557363 | 0.367065       |
| SLC37A4  | 0.545263 | 1.466712       |
| SLC20A2  | 0.523111 | 1.663723       |
| SLC39A4  | 0.511753 | 2.772043       |
| SLC15A2  | 0.494293 | <b>No data</b> |
| SLC25A12 | 0.491284 | 0.947139       |
| SLC16A13 | 0.49106  | 0.266753       |
| SLC9A4   | 0.472869 | 0.029917       |
| RHBG     | 0.454494 | 0              |
| SLC46A2  | 0.393315 | 0.506613       |
| SLC7A1   | 0.392402 | 0.113242       |
| SLC41A1  | 0.39035  | 0.153188       |
| SLCO4A1  | 0.386293 | 0.030919       |
| SLC39A10 | 0.375107 | 0.280526       |
| SLC12A2  | 0.358682 | 0.251158       |
| SLC10A7  | 0.354472 | 0.47415        |
| SLC4A8   | 0.346928 | 1.085581       |
| SLC24A1  | 0.343325 | 0.556316       |
| SLC16A1  | 0.341766 | 0.100955       |
| SLC41A3  | 0.33136  | 1.309153       |
| SLC29A3  | 0.3301   | 0.613083       |
| SLC28A2  | 0.319969 | 0              |
| SLC6A16  | 0.313818 | 0.702131       |
| SLC25A53 | 0.301434 | 3.752335       |
| SLC25A26 | 0.300095 | 0.448138       |
| SLC41A2  | 0.293223 | 1.133091       |
| SLC2A6   | 0.275303 | 0.812577       |
| SLC2A8   | 0.273322 | 0.814157       |
| SLC45A3  | 0.269156 | 0.69311        |
| SLC6A20  | 0.25677  | 0.06559        |
| SLC18B1  | 0.256123 | 0.353239       |
| SLC2A4   | 0.252583 | 0.003538       |
| SLC3A1   | 0.249917 | 0.161592       |
| SLC6A13  | 0.235715 | 0.26222        |
| SLC44A4  | 0.222833 | 0.025491       |
| SLC43A1  | 0.220751 | 0.140674       |
| SLC25A42 | 0.217023 | 0.229577       |
| SLC39A14 | 0.215165 | 0.066361       |
| SLC12A8  | 0.215099 | 24.8685        |



|          |          |                |
|----------|----------|----------------|
| SLC2A9   | 0.213474 | 1.134367       |
| SLC9A9   | 0.206143 | 0.471828       |
| SLC15A1  | 0.205513 | 0              |
| SLC27A1  | 0.190422 | 0.350563       |
| SLC35F1  | 0.183551 | 0              |
| SLC30A4  | 0.17871  | 0.043864       |
| SLC25A18 | 0.173669 | 0.178288       |
| SLC23A3  | 0.171536 | <b>No data</b> |
| SLC27A2  | 0.165621 | 0.147139       |
| SLC17A9  | 0.163025 | 0.220222       |
| FLVCR2   | 0.161085 | 2.995074       |
| SLC25A35 | 0.155719 | 0.474642       |
| SLC25A23 | 0.152735 | 0.092535       |
| SLC25A27 | 0.15039  | 0.499895       |
| SLC25A10 | 0.148419 | 1.767058       |
| SLC2A13  | 0.142042 | 0.254337       |
| SLC38A5  | 0.140477 | 0.244678       |
| SLC14A2  | 0.138358 | 0.023388       |
| SLC35B4  | 0.135503 | 0.133596       |
| SLC16A7  | 0.133516 | 0.174023       |
| SLC22A13 | 0.132108 | 0.031119       |
| SLC22A14 | 0.128302 | 0.112629       |
| SLC45A2  | 0.124561 | 0.079131       |
| SLC47A1  | 0.123309 | 0.295644       |
| SLC14A1  | 0.120003 | 0.049875       |
| SLC2A11  | 0.119388 | <b>No data</b> |
| SLC9B2   | 0.117721 | <b>No data</b> |
| SLC25A43 | 0.110956 | 0.305292       |
| SLC38A6  | 0.106089 | <b>No data</b> |
| SLC25A2  | 0.105079 | 0.012352       |
| SLC28A1  | 0.105037 | 0.018301       |
| SLC35E4  | 0.099345 | 0.114885       |
| SLC22A17 | 0.096723 | 0.019834       |
| SLC7A10  | 0.096162 | 0.056653       |
| SLC4A1   | 0.094702 | <b>No data</b> |
| SLC52A1  | 0.093662 | 0.002782       |
| SLC7A9   | 0.091258 | 0.059758       |
| SLC38A7  | 0.090202 | 0.139128       |
| SLC5A10  | 0.084047 | 0.008357       |
| SLC16A8  | 0.076297 | 0.09536        |

|          |          |          |
|----------|----------|----------|
| SLC22A9  | 0.075539 | 0        |
| SLC7A14  | 0.071874 | 0        |
| SLC35F2  | 0.07121  | 0.088443 |
| SLC18A1  | 0.06938  | 0.193916 |
| SLC26A4  | 0.06696  | 0.013925 |
| SLC35G2  | 0.066789 | 0.004921 |
| SLC30A8  | 0.064359 | 0.004751 |
| SLC13A4  | 0.062869 | 0.292333 |
| SLC9B1   | 0.06115  | 0.013052 |
| SLC28A3  | 0.057827 | 0.036177 |
| SLC22A16 | 0.056745 | 0.14271  |
| SLC32A1  | 0.055365 | 0        |
| SLC16A10 | 0.055337 | 0.013955 |
| SLC45A1  | 0.055306 | 0.026179 |
| SLC24A5  | 0.055127 | 0.314604 |
| SLC2A12  | 0.053854 | 0.341995 |
| SLC29A2  | 0.053376 | 0.038654 |
| SLC25A47 | 0.049291 | 0.007801 |
| SLC16A11 | 0.048024 | 0        |
| SLC22A23 | 0.047533 | 0.146284 |
| SLC25A4  | 0.047498 | 0.070657 |
| SLC25A52 | 0.046697 | 0.01043  |
| SLC26A1  | 0.045243 | 0.203451 |
| SLCO1A2  | 0.044854 | 0        |
| SLC4A4   | 0.044376 | 0.018906 |
| SLC4A9   | 0.043369 | 0.053466 |
| SLC5A11  | 0.042816 | 0.009208 |
| SLC6A14  | 0.040641 | 0        |
| SLC9A3   | 0.038749 | 0.010525 |
| SLC35G1  | 0.038543 | 0.138574 |
| SLC1A2   | 0.038243 | 0.001444 |
| SLC35G6  | 0.036646 | 0        |
| SLC19A3  | 0.035449 | 0        |
| SLC27A5  | 0.03506  | 0.057876 |
| SLC46A1  | 0.034287 | 0.0454   |
| SLC4A10  | 0.031961 | 0.010504 |
| SLC29A4  | 0.031852 | 0.002375 |
| SLC4A11  | 0.030189 | 0.006052 |
| SLC13A1  | 0.030136 | 0        |
| SLC13A5  | 0.028342 | 0.014783 |

|          |          |                |
|----------|----------|----------------|
| SLC10A4  | 0.027983 | 0.008142       |
| SLC1A3   | 0.027724 | 0.080618       |
| SLC16A12 | 0.027205 | 0              |
| SLC26A5  | 0.026607 | 0              |
| SLC1A7   | 0.026587 | 0.053328       |
| SLC35G5  | 0.026139 | 0              |
| SLC8A2   | 0.024413 | 0.011955       |
| SLC10A5  | 0.021475 | 0              |
| SLCO5A1  | 0.021423 | 0.01598        |
| SLC9A5   | 0.017925 | 0.008151       |
| SLC4A3   | 0.017676 | 0.044514       |
| SLC44A3  | 0.017549 | 0.089591       |
| SLC38A11 | 0.017394 | 0.057391       |
| SLC17A3  | 0.0168   | 0              |
| SLC5A2   | 0.016518 | 0.188793       |
| SLC34A1  | 0.014604 | 0.007438       |
| RHCG     | 0.014434 | 0              |
| SLC6A4   | 0.014124 | 0.042066       |
| SLC34A3  | 0.013134 | 0              |
| SLC6A2   | 0.012301 | 0              |
| SLC7A4   | 0.01204  | 0              |
| SLC44A5  | 0.010659 | 0.004211       |
| SLC24A2  | 0.009822 | 0              |
| SLC8A3   | 0.009751 | 0.074688       |
| SLC38A3  | 0.009671 | 0              |
| SLC36A3  | 0.009293 | 0              |
| SLC12A3  | 0.008825 | 0.008359       |
| SLC1A1   | 0.007744 | 0.014113       |
| SLC12A5  | 0.006559 | 0.027903       |
| SLC2A10  | 0.006494 | 0.096226       |
| SLC39A5  | 0.006383 | 0.008053       |
| SLC16A2  | 0.006309 | 0              |
| SLC26A7  | 0.006272 | <b>No data</b> |
| SLC6A3   | 0.005945 | 0.001777       |
| SLC22A7  | 0.005874 | 0              |
| SLC9A2   | 0.004401 | 0.007815       |
| SLC6A9   | 0.003785 | 0              |
| SLC13A3  | 0.002597 | 0              |
| SLCO1B7  | 0        | 0              |
| SLC22A31 | 0        | <b>No data</b> |

|                 |   |                |
|-----------------|---|----------------|
| <i>SLC26A10</i> | 0 | <b>No data</b> |
| <i>SLCO1B1</i>  | 0 | 0              |
| <i>SLC25A6</i>  | 0 | 17.00073       |
| <i>SLC39A2</i>  | 0 | 0.039487       |
| <i>SLC35F3</i>  | 0 | 0.032623       |
| <i>SLC35D3</i>  | 0 | 0.026302       |
| <i>SLC34A2</i>  | 0 | 0.010175       |
| <i>SLC30A2</i>  | 0 | 0.009504       |
| <i>SLC27A6</i>  | 0 | 0.008934       |
| <i>SLC10A6</i>  | 0 | 0.006882       |
| <i>RHAG</i>     | 0 | 0.004514       |
| <i>SLC17A7</i>  | 0 | 0.004465       |
| <i>SLC22A3</i>  | 0 | 0.003755       |
| <i>SLC26A3</i>  | 0 | 0.002922       |
| <i>SLC16A9</i>  | 0 | 0.002449       |
| <i>SLC52A3</i>  | 0 | 0.002154       |
| <i>SLC17A8</i>  | 0 | 0.002021       |
| <i>SLCO2B1</i>  | 0 | 0.001259       |
| <i>SLC10A2</i>  | 0 | 0              |
| <i>SLC13A2</i>  | 0 | 0              |
| <i>SLC15A5</i>  | 0 | 0              |
| <i>SLC17A1</i>  | 0 | 0              |
| <i>SLC17A2</i>  | 0 | 0              |
| <i>SLC17A4</i>  | 0 | 0              |
| <i>SLC17A6</i>  | 0 | 0              |
| <i>SLC18A3</i>  | 0 | 0              |
| <i>SLC1A6</i>   | 0 | 0              |
| <i>SLC22A10</i> | 0 | 0              |
| <i>SLC22A11</i> | 0 | 0              |
| <i>SLC22A12</i> | 0 | 0              |
| <i>SLC22A2</i>  | 0 | 0              |
| <i>SLC22A24</i> | 0 | 0              |
| <i>SLC22A25</i> | 0 | 0              |
| <i>SLC22A6</i>  | 0 | 0              |
| <i>SLC22A8</i>  | 0 | 0              |
| <i>SLC25A21</i> | 0 | 0              |
| <i>SLC25A31</i> | 0 | 0              |
| <i>SLC25A41</i> | 0 | 0              |
| <i>SLC25A48</i> | 0 | 0              |
| <i>SLC26A9</i>  | 0 | 0              |

|          |   |   |
|----------|---|---|
| SLC2A2   | 0 | 0 |
| SLC2A7   | 0 | 0 |
| SLC30A10 | 0 | 0 |
| SLC30A3  | 0 | 0 |
| SLC35F4  | 0 | 0 |
| SLC35G3  | 0 | 0 |
| SLC38A4  | 0 | 0 |
| SLC38A8  | 0 | 0 |
| SLC39A12 | 0 | 0 |
| SLC47A2  | 0 | 0 |
| SLC51B   | 0 | 0 |
| SLC5A1   | 0 | 0 |
| SLC5A12  | 0 | 0 |
| SLC5A4   | 0 | 0 |
| SLC5A7   | 0 | 0 |
| SLC5A8   | 0 | 0 |
| SLC6A1   | 0 | 0 |
| SLC6A11  | 0 | 0 |
| SLC6A15  | 0 | 0 |
| SLC6A17  | 0 | 0 |
| SLC6A18  | 0 | 0 |
| SLC6A19  | 0 | 0 |
| SLC6A5   | 0 | 0 |
| SLC6A7   | 0 | 0 |
| SLC7A13  | 0 | 0 |
| SLC7A2   | 0 | 0 |
| SLC7A3   | 0 | 0 |
| SLC9C1   | 0 | 0 |
| SLC9C2   | 0 | 0 |
| SLCO1B3  | 0 | 0 |
| SLCO1C1  | 0 | 0 |
| SLCO2A1  | 0 | 0 |
| SLCO6A1  | 0 | 0 |
| UCP1     | 0 | 0 |

The table shows all human SLC transporter genes and their expression values (given as FPKM values) as found in datasets from Wright *et al.* and Chatterjee *et al.*<sup>21,33</sup>. Entries are given as the mean of replicate values, in descending order of expression according to the dataset by Wright *et al.*. Any genes which could not be identified in the dataset by Chatterjee *et al.* are labelled as 'No data'.

**Supplementary Table S4. Expression of ABC transporter proteins is largely consistent across two different datasets.**

| ABC transporter | Expression (FPKM)           |                                 |
|-----------------|-----------------------------|---------------------------------|
|                 | Wright <i>et al.</i> , 2013 | Chatterjee <i>et al.</i> , 2016 |
| <i>TAP1</i>     | 143.682                     | 456.3108                        |
| <i>TAP2</i>     | 51.0473                     | 132.7189                        |
| <i>ABCA7</i>    | 37.334                      | 178.8746                        |
| <i>ABCG1</i>    | 25.6516                     | <b>No data</b>                  |
| <i>ABCA1</i>    | 17.5845                     | 11.97111                        |
| <i>ABCC5</i>    | 12.5493                     | 16.24293                        |
| <i>ABCD1</i>    | 7.27776                     | 9.552486                        |
| <i>ABCF1</i>    | 7.27122                     | 5.90886                         |
| <i>ABCA2</i>    | 7.15235                     | 18.60513                        |
| <i>ABCC1</i>    | 6.83516                     | 8.063192                        |
| <i>ABCF3</i>    | 4.72307                     | 14.26925                        |
| <i>ABCC9</i>    | 2.21629                     | 0                               |
| <i>ABCD3</i>    | 1.59239                     | 1.14281                         |
| <i>ABCF2</i>    | 1.21202                     | 1.350599                        |
| <i>ABCA5</i>    | 1.18218                     | 1.080757                        |
| <i>ABCD4</i>    | 1.11062                     | 7.700425                        |
| <i>ABCB10</i>   | 1.00666                     | 1.87598                         |
| <i>ABCC6</i>    | 0.970651                    | 2.83314                         |
| <i>ABCC10</i>   | 0.940023                    | 4.91765                         |
| <i>ABCB7</i>    | 0.927628                    | 1.25014                         |
| <i>ABCC2</i>    | 0.839153                    | 17.38025                        |
| <i>ABCE1</i>    | 0.599287                    | 0.6684927                       |
| <i>ABCB5</i>    | 0.53339                     | 0.00458515                      |
| <i>ABCB6</i>    | 0.367747                    | 20.8678                         |
| <i>ABCB1</i>    | 0.319107                    | 0.2100675                       |
| <i>ABCB8</i>    | 0.313178                    | 1.246972                        |
| <i>ABCA13</i>   | 0.291386                    | 0.4219312                       |
| <i>ABCC4</i>    | 0.218874                    | 0.505737                        |
| <i>ABCA9</i>    | 0.139689                    | 0.03220053                      |
| <i>ABCB9</i>    | 0.0938531                   | 0.05274925                      |
| <i>ABCB11</i>   | 0.0664028                   | 0.02136092                      |
| <i>ABCC3</i>    | 0.0612735                   | 2.804117                        |

|               |            |             |
|---------------|------------|-------------|
| <i>ABCA3</i>  | 0.0505832  | 0.05429485  |
| <i>ABCD2</i>  | 0.0494921  | 0.02637948  |
| <i>ABCA10</i> | 0.0291777  | 1.080757    |
| <i>ABCG2</i>  | 0.026239   | 0.000778308 |
| <i>ABCB4</i>  | 0.014383   | 0.2529438   |
| <i>ABCC11</i> | 0.0118731  | 0.00540443  |
| <i>ABCA6</i>  | 0.0101404  | 0.01867935  |
| <i>ABCA4</i>  | 0.00612525 | 0.009292483 |
| <i>ABCA12</i> | 0          | 0           |
| <i>ABCA8</i>  | 0          | 0           |
| <i>ABCC12</i> | 0          | 0.001889568 |
| <i>ABCC8</i>  | 0          | 0           |
| <i>ABCG4</i>  | 0          | 0.001287225 |
| <i>ABCG5</i>  | 0          | 0           |
| <i>ABCG8</i>  | 0          | 0           |
| <i>CFTR</i>   | 0          | 0           |

The table shows all human SLC transporter genes and their expression values (given as FPKM values) as found in datasets from Wright *et al.* and Chatterjee *et al.*<sup>21,33</sup>. Entries are given as the mean of replicate values, in descending order of expression according to the dataset by Wright *et al.*. Any genes which could not be identified in the dataset by Chatterjee *et al.* are labelled as 'No data'.

## Supplementary Figure S5. Zebrafish neutrophils and non-neutrophil cells express distinct subsets of SLC transporter proteins.

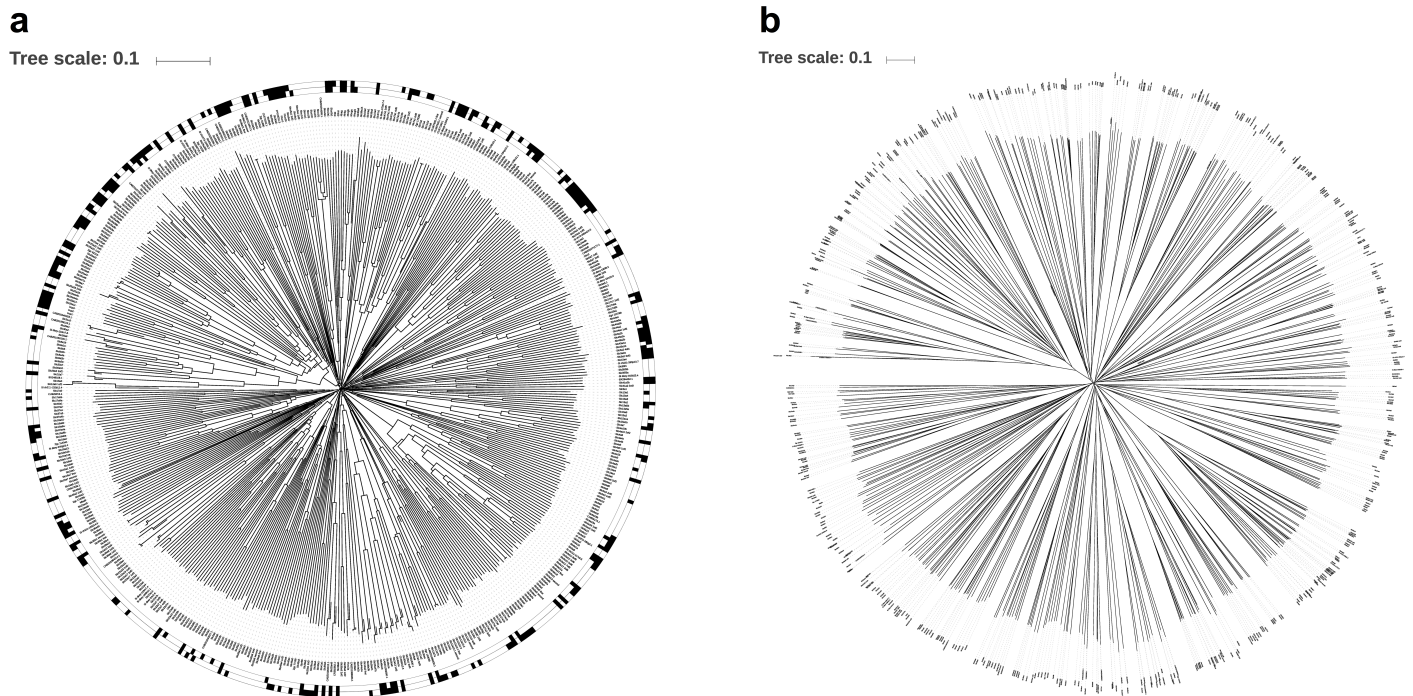

Scalable phylogenetic trees in both (a) circular and (b) unrooted display modes indicate evolutionary relationships between SLC transporter proteins in zebrafish. Branch lengths are proportional to genetic distance. In (a), for both neutrophil (inner circle) and background cell (outer circle) expression data, expressed proteins are marked with a black box, whereas proteins not expressed are unmarked



## Supplementary Figure S6. Zebrafish neutrophils and non-neutrophil cells express distinct subsets of ABC transporter proteins.

**a**

Tree scale: 0.1

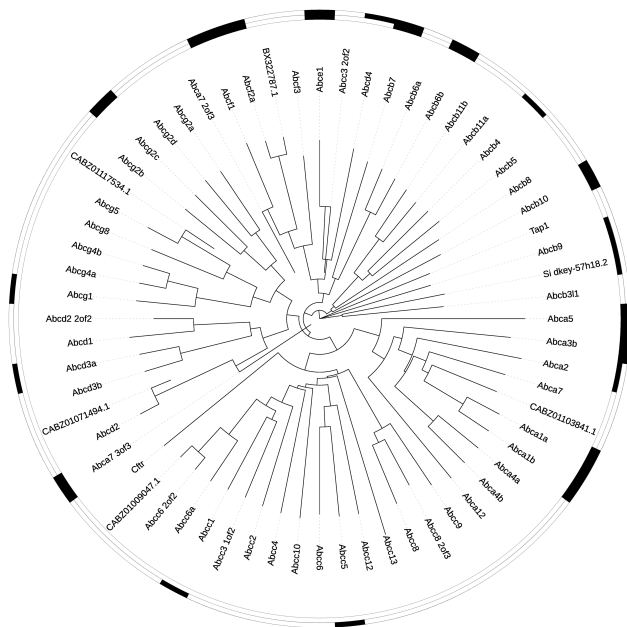

**b**

Tree scale: 0.1

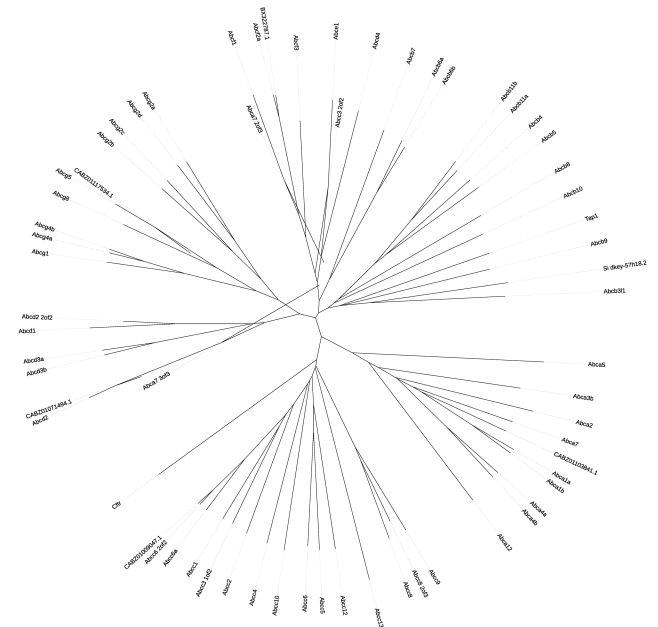

Scalable phylogenetic trees in both (a) circular and (b) unrooted display modes indicate evolutionary relationships between ABC transporter proteins in zebrafish. Branch lengths are proportional to genetic distance. In (a), for both neutrophil (inner circle) and background cell (outer circle) expression data, expressed proteins are marked with a black box, whereas proteins not expressed are unmarked.

**Supplementary Table S7. A subset of SLC drug transporters are expressed in both human and zebrafish neutrophils.**

| <b>Human gene</b> | <b>Zebrafish orthologue gene(s)</b> |
|-------------------|-------------------------------------|
| <i>DIRC2</i>      | <i>dirc2</i>                        |
| <i>FLVCR1</i>     | <i>flvcr1</i>                       |
| <i>MTCH2</i>      | <i>mtch2</i>                        |
| <i>SLC10A3</i>    | <i>slc10a3</i>                      |
| <i>SLC12A9</i>    | <i>slc12a9</i>                      |
| <i>SLC15A4</i>    | <i>slc15a4</i>                      |
| <i>SLC16A3</i>    | <i>slc16a3</i>                      |
| <i>SLC16A6</i>    | <i>slc16a6b</i>                     |
| <i>SLC19A1</i>    | <i>slc19a1</i>                      |
| <i>SLC1A4</i>     | <i>slc1a4</i>                       |
| <i>SLC20A1</i>    | <i>slc20a1b</i>                     |
| <i>SLC22A15</i>   | <i>slc22a15_1of2</i>                |
| <i>SLC22A18</i>   | <i>slc22a18</i>                     |
| <i>SLC25A1</i>    | <i>slc25a1a</i>                     |
| <i>SLC25A11</i>   | <i>slc25a11</i>                     |
| <i>SLC25A14</i>   | <i>slc25a14</i>                     |
| <i>SLC25A20</i>   | <i>slc25a20</i>                     |
| <i>SLC25A22</i>   | <i>slc25a22</i>                     |
| <i>SLC25A24</i>   | <i>slc25a24</i>                     |
| <i>SLC25A25</i>   | <i>slc25a25a</i>                    |
| <i>SLC25A28</i>   | <i>slc25a28_first</i>               |
| <i>SLC25A3</i>    | <i>slc25a3b</i>                     |
| <i>SLC25A32</i>   | <i>slc25a32a</i>                    |
| <i>SLC25A33</i>   | <i>slc25a33</i>                     |
| <i>SLC25A36</i>   | <i>slc25a36a; slc25a36b</i>         |
| <i>SLC25A39</i>   | <i>slc25a39</i>                     |
| <i>SLC25A40</i>   | <i>slc25a40</i>                     |
| <i>SLC25A44</i>   | <i>slc25a44b</i>                    |
| <i>SLC25A46</i>   | <i>slc25a46</i>                     |
| <i>SLC25A5</i>    | <i>slc25a5</i>                      |
| <i>SLC27A3</i>    | <i>slc27a3</i>                      |
| <i>SLC2A1</i>     | <i>slc2a1b</i>                      |

|                |                           |
|----------------|---------------------------|
| <i>SLC2A3</i>  | <i>slc2a3b</i>            |
| <i>SLC30A1</i> | <i>slc30a1a</i>           |
| <i>SLC30A5</i> | <i>slc30a5</i>            |
| <i>SLC30A7</i> | <i>slc30a7</i>            |
| <i>SLC30A9</i> | <i>slc30a9</i>            |
| <i>SLC31A1</i> | <i>slc31a1</i>            |
| <i>SLC31A2</i> | <i>slc31a2</i>            |
| <i>SLC35A2</i> | <i>slc35a2</i>            |
| <i>SLC35C1</i> | <i>slc35c1</i>            |
| <i>SLC35D1</i> | <i>slc35d1a</i>           |
| <i>SLC35D2</i> | <i>slc35d2</i>            |
| <i>SLC35E1</i> | <i>slc35e1</i>            |
| <i>SLC35E3</i> | <i>slc35e3</i>            |
| <i>SLC36A1</i> | <i>slc36a1</i>            |
| <i>SLC37A2</i> | <i>slc37a2</i>            |
| <i>SLC38A2</i> | <i>slc38a2</i>            |
| <i>SLC39A6</i> | <i>slc39a6</i>            |
| <i>SLC39A7</i> | <i>slc39a7</i>            |
| <i>SLC3A2</i>  | <i>slc3a2a; slc3a2b;</i>  |
| <i>SLC40A1</i> | <i>slc40a1</i>            |
| <i>SLC43A2</i> | <i>slc43a2a; slc43a2b</i> |
| <i>SLC43A3</i> | <i>slc43a3b</i>           |
| <i>SLC44A2</i> | <i>slc44a2</i>            |
| <i>SLC48A1</i> | <i>slc48a1a; slc48a1b</i> |
| <i>SLC4A2</i>  | <i>slc4a2b</i>            |
| <i>SLC51A</i>  | <i>slc51a</i>             |
| <i>SLC6A6</i>  | <i>slc6a6a</i>            |
| <i>SLC7A5</i>  | <i>slc7a5</i>             |
| <i>SLC7A7</i>  | <i>slc7a7</i>             |
| <i>SLC8B1</i>  | <i>FP103011.3</i>         |
| <i>SLC9A8</i>  | <i>slc9a8</i>             |
| <i>SLCO3A1</i> | <i>slco3a1</i>            |
| <i>UCP2</i>    | <i>ucp2</i>               |

The list shows all SLC drug transporter genes which we found both to be expressed in primary human neutrophils, and which also had at least one corresponding zebrafish orthologue (shown here alongside the relevant human gene) expressed in zebrafish neutrophils.

**Supplementary Table S8. A subset of ABC drug transporters are expressed in both human and zebrafish neutrophils.**

| <b>Human gene</b> | <b>Zebrafish orthologue gene(s)</b> |
|-------------------|-------------------------------------|
| <i>ABCA1</i>      | <i>abca1a; abca1b</i>               |
| <i>ABCA2</i>      | <i>abca2</i>                        |
| <i>ABCA5</i>      | <i>abca5</i>                        |
| <i>ABCA7</i>      | <i>abca7_3of3</i>                   |
| <i>ABCB10</i>     | <i>abcb10</i>                       |
| <i>ABCF1</i>      | <i>abcf1</i>                        |
| <i>ABCF2</i>      | <i>abcf2a</i>                       |
| <i>TAP2</i>       | <i>si:dkey-57h18.2</i>              |

The list shows all ABC drug transporter genes which we found both to be expressed in primary human neutrophils, and which also had at least one corresponding zebrafish orthologue (shown here alongside the relevant human gene) expressed in zebrafish neutrophils.
